# Supplementary material for: Facile and highly efficient “living” radical polymerization of hydrophilic vinyl monomers in water
Source: Royal Society of Chemistry journal article supplement (doi:10.1039/c4ra09439e), 2014-10-10
Supplement: c4ra09439e1.pdf [file c4ra09439e1.pdf]

## Electronic Supporting Information (ESI)

### Facile, Universal and Highly Efficient “Living” Radical Polymerization of Hydrophilic Vinyl Monomers in Water

Hongjuan Jiang, Chun Tian, Lifen Zhang, Zhenping Cheng\* and Xiulin Zhu\*

*Suzhou key Laboratory of Macromolecular Design and Precision Synthesis, Jiangsu Key Laboratory of Advanced Functional Polymer Design and Application, Department of Polymer Science and Engineering, College of Chemistry, Chemical Engineering and Materials Science, Soochow University, Suzhou 215123, China*

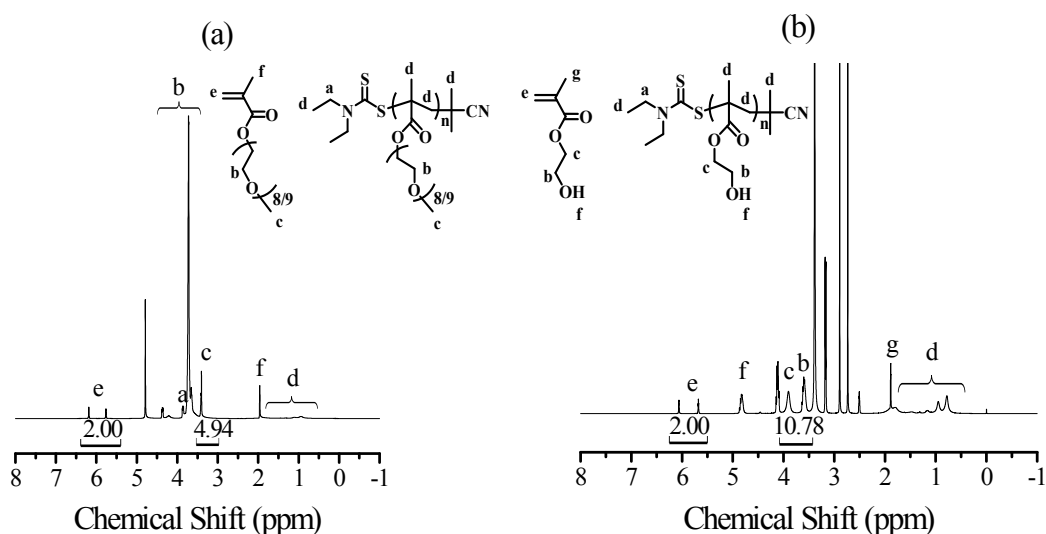

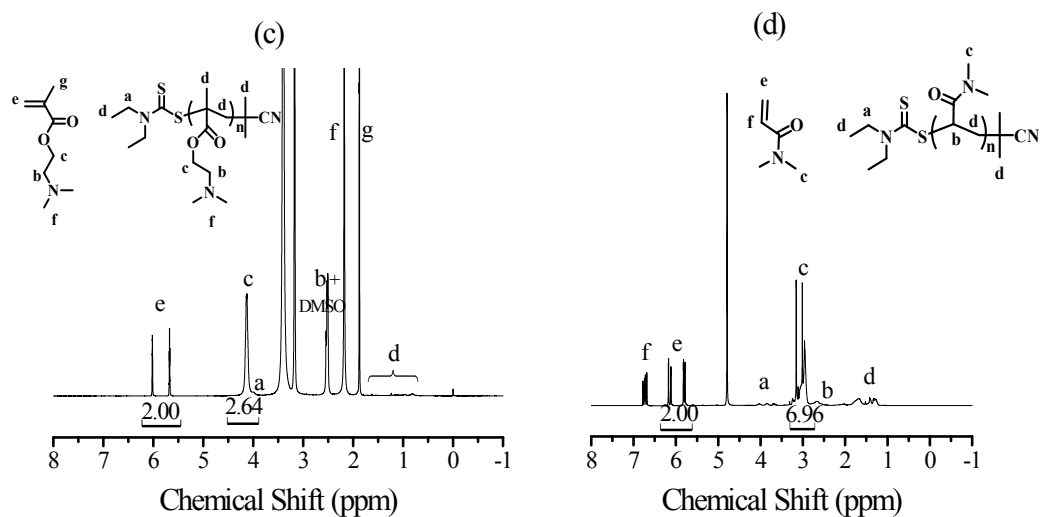

**Figure S1.**  $^1\text{H}$  NMR spectra of polymerization reaction mixture obtained with  $\text{D}_2\text{O}$  or DMSO as solvent. (a) PEGMA in  $\text{D}_2\text{O}$ ; (b) HEMA in DMSO; (c) DMAEMA in DMSO; (d) DMA in  $\text{D}_2\text{O}$ . The conversion was calculated from following formulas: (a)  $\text{Con. (\%)} = [1 - (3I_e/2I_c)] \times 100\%$ ; (b)  $\text{Con. (\%)} = [1 - (4I_e/2I_{c+b})] \times 100\%$ ; (c)  $\text{Con. (\%)} = [1 - (2I_e/2I_c)] \times 100\%$ ; (d)  $\text{Con. (\%)} = [1 - (6I_e/2I_c)] \times 100\%$ .
